# Supplementary material
Source: PubMed Central journal article supplement (PMC5638669)

1 **SUPPORTING INFORMATION**

2

3 **Supplementary Figure 1. Silencing of RIPK3, MLKL, and Bcl-x<sub>L</sub> in M $\phi$  infected with *Mtb***  
4 **prevents necrosis.** Human M $\phi$  were transfected with RIPK3 (II) (A), MLKL siRNA (B) or  
5 scrambled control (Scr) RNA and gene expression was assessed using Western blotting. (A)  
6 RIPK3 (second siRNA) or (C) Bcl-x<sub>L</sub> deficient M $\phi$  were infected with H37Rv (MOI 5 or 10). Cell  
7 death was assessed using Live/Dead fixable dead cell stain kits (Invitrogen). Results are  
8 representative of pooling three wells per group and the numbers in histograms indicate the  
9 percentage of dead cells. Data are representative of 2-3 independent experiments. Results are  
10 represented as mean  $\pm$  SE. Data were analyzed using one-way ANOVA. \* Values of  $P < 0.05$   
11 were considered to be significant. Data are representative of 2 independent experiments.

12

13 **Supplementary Figure 2. Avirulent *Mtb* induces apoptosis independent of RIPK3.** BMD-  
14 M $\phi$  from WT and RIPK3<sup>-/-</sup> mice were infected with H37Ra at MOI of ~10. After 12 h, expression  
15 of cleaved caspase 8 (A) and cleaved caspase 3 (B,C) was assessed using flow cytometry. (D)  
16 H37Ra infected WT and RIPK3<sup>-/-</sup>M $\phi$  were stained for Annexin V to assess apoptosis after 96h  
17 of infection. Results are represented as mean  $\pm$  SE. Data were analyzed using one-way  
18 ANOVA. \*,\*\*\* Values of  $P < 0.05$ ,  $P < 0.01$ , respectively were considered to be significant. Data  
19 are representative of 2 independent experiments.

20

21 **Supplementary Figure 3. Silencing of the HKII or the RIPK3 genes suppresses NADH**  
22 **accumulation in M $\phi$  infected with H37Rv.** (A) Inputs for Figure 2 A. (B) M $\phi$  transfected with  
23 **HKII.** RIPK3 siRNA or scrambled (Scr) control RNA (Scr) were infected with H37Rv (MOI 10).  
24 NADH levels were measured for HKII (C) and RIPK3 (D) silenced gene at 0, 6 and 24 h after  
25 infection (n=3).

1 **Supplementary Figure 4. Gating strategy for assessing neutrophils in the lung.** Lung cells  
2 were gated for leukocytes based on size (FSC-A) and granularity (SSC-A). Doublets were  
3 excluded by gating on FSC-A and FSC-H. Singlets were gated for viable cells. Prior to gate  
4 neutrophils, live cells were gated for CD11b+SSC-A+.

5

6 **Supplementary Figure 5. RIPK3 deficient T cells have normal proliferative capacity *in***  
7 ***vitro* and *in vivo*.** (A) Splenic T cells were purified from naïve WT and RIPK3<sup>-/-</sup> mice using Pan  
8 T cell microbeads (MACS). T cells were then labeled with CFSE and cultured with or without  
9 anti-CD3 and anti-CD8 for 3 days. The percentage of T cell proliferation (CFSE dilution) was  
10 measured by FACS analysis. There was no difference between RIPK3<sup>-/-</sup> and WT CD3+CD4+ or  
11 CD3+CD8+ T cells proliferation. (B and C) Total cell number of CD4+ T cells and ESAT6-  
12 specific CD4+ T cells (B) as well as CD8+ T cells and TB10.4-specific CD8+ T cells (C) in lung  
13 at day 35 post-aerosolized infection (H37Rv, 50-100 CFU). (D) ELISPOT of IFN $\gamma$  production  
14 showing the frequency of *Mtb*-specific CD4<sup>+</sup> and CD8<sup>+</sup> T cells after 35 days of infection. Lung  
15 cells from infected RIPK3<sup>-/-</sup> and WT were cultured with ESAT6<sub>(3-15)</sub>, Ag85B<sub>(241-256)</sub>, TB10.4<sub>(4-11)</sub>,  
16 and 32c<sub>(309-318)</sub>. SFC, spot-forming cells. APC-conjugated streptavidin-phycoerythrin was used  
17 as a control for the tetramer staining. Five mice were individually analyzed and the data are  
18 given as mean value  $\pm$  SE. (E) The number of bacteria in H37Rv-infected RIPK3<sup>-/-</sup> and WT M $\phi$   
19 prior to adoptive transfer.

20

21

## Supplementary Figure 1

A

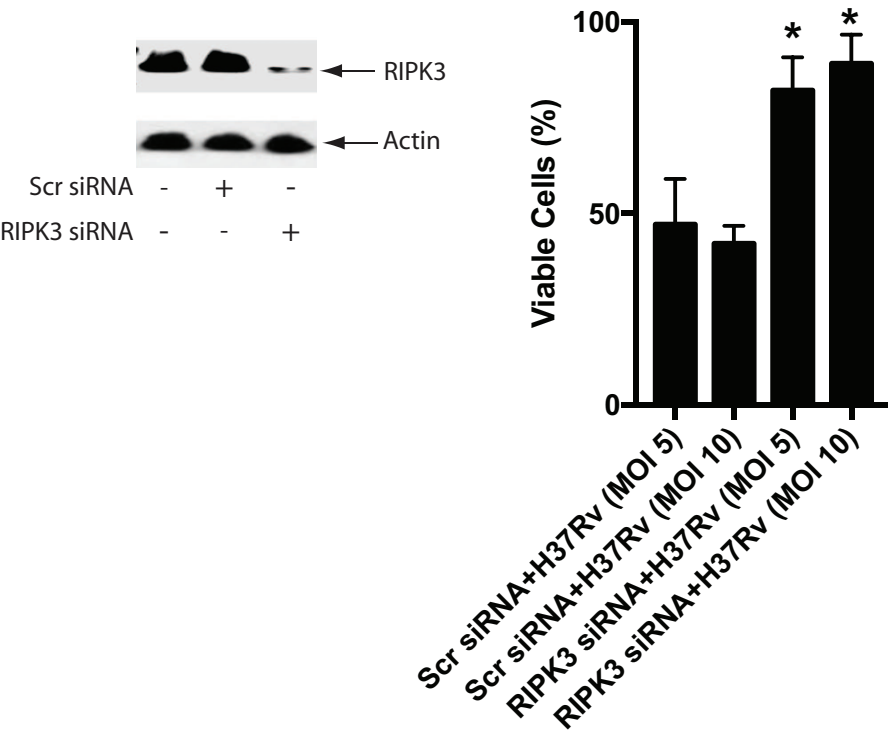

B

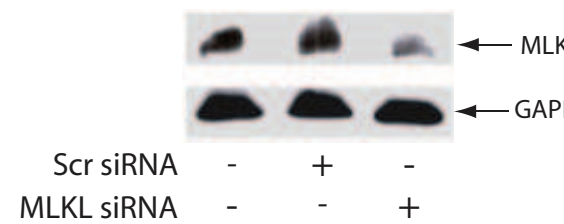

C

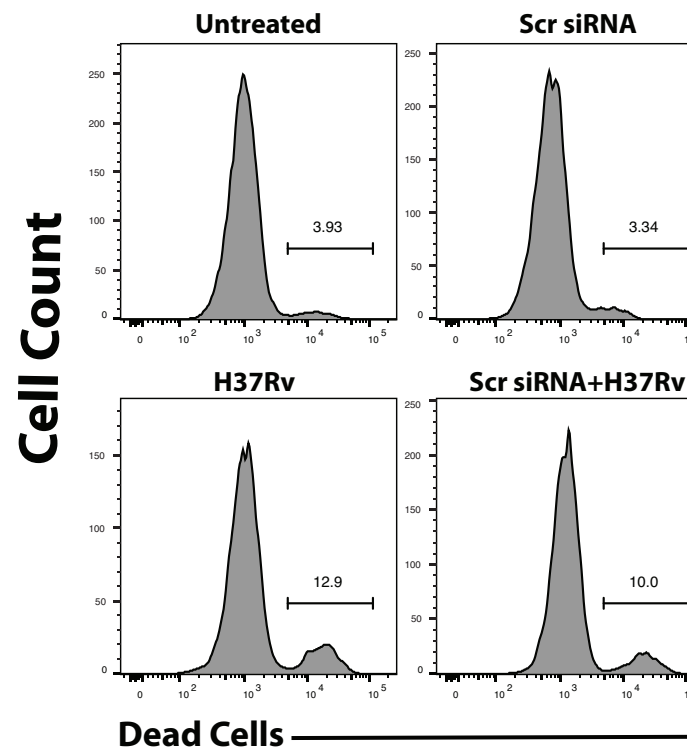

## Supplementary Figure 2

A

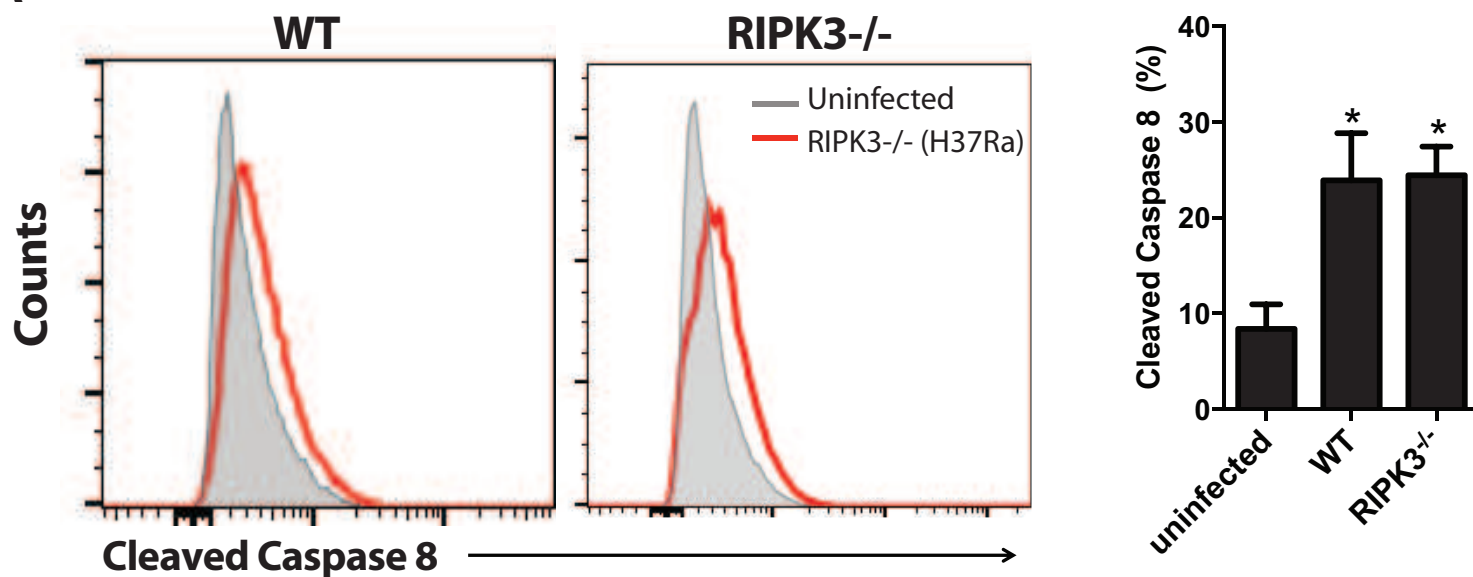

B

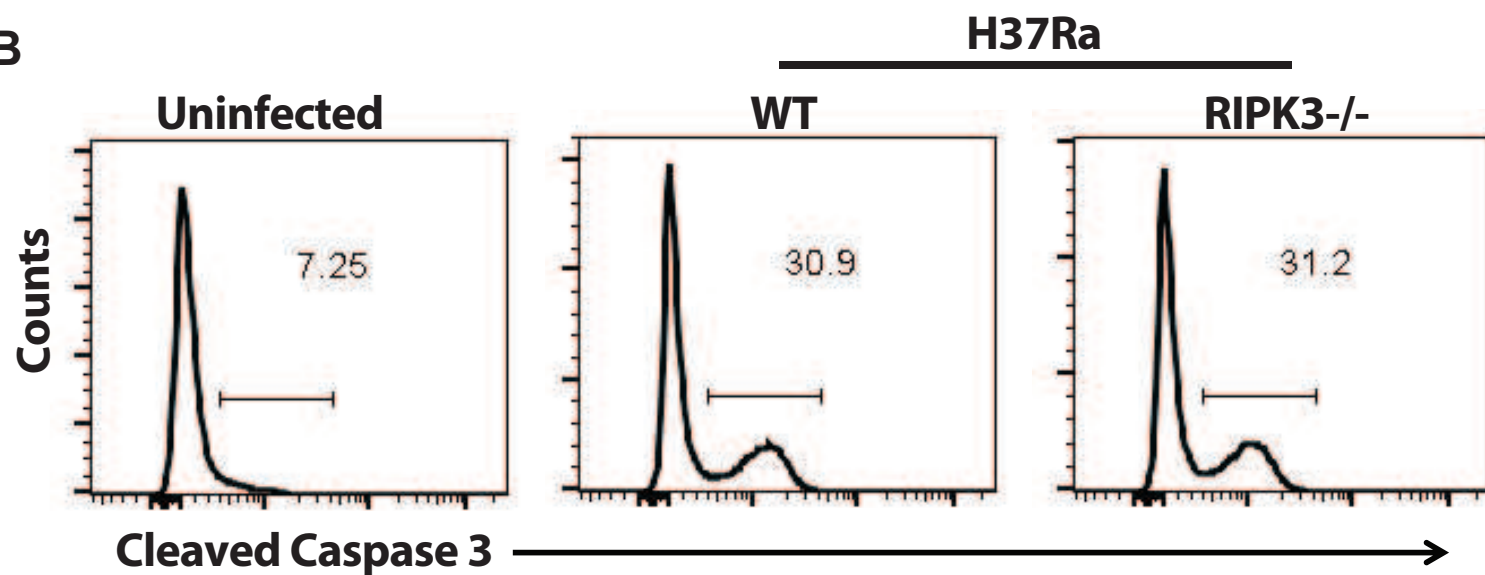

C

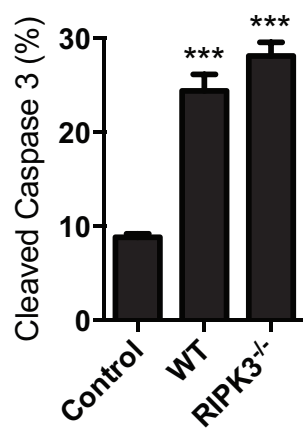

D

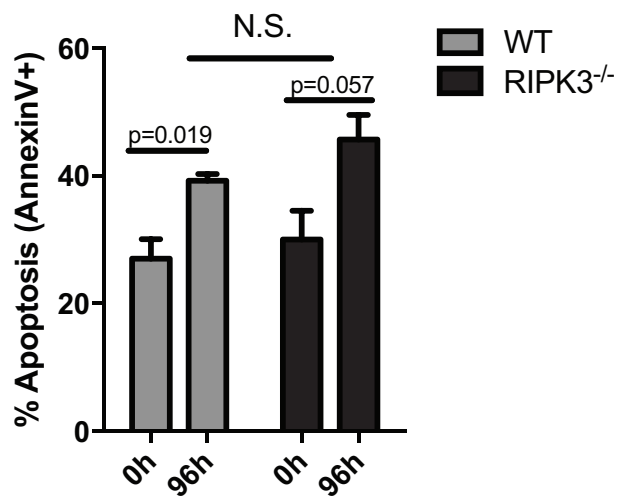

## Supplementary Figure 3

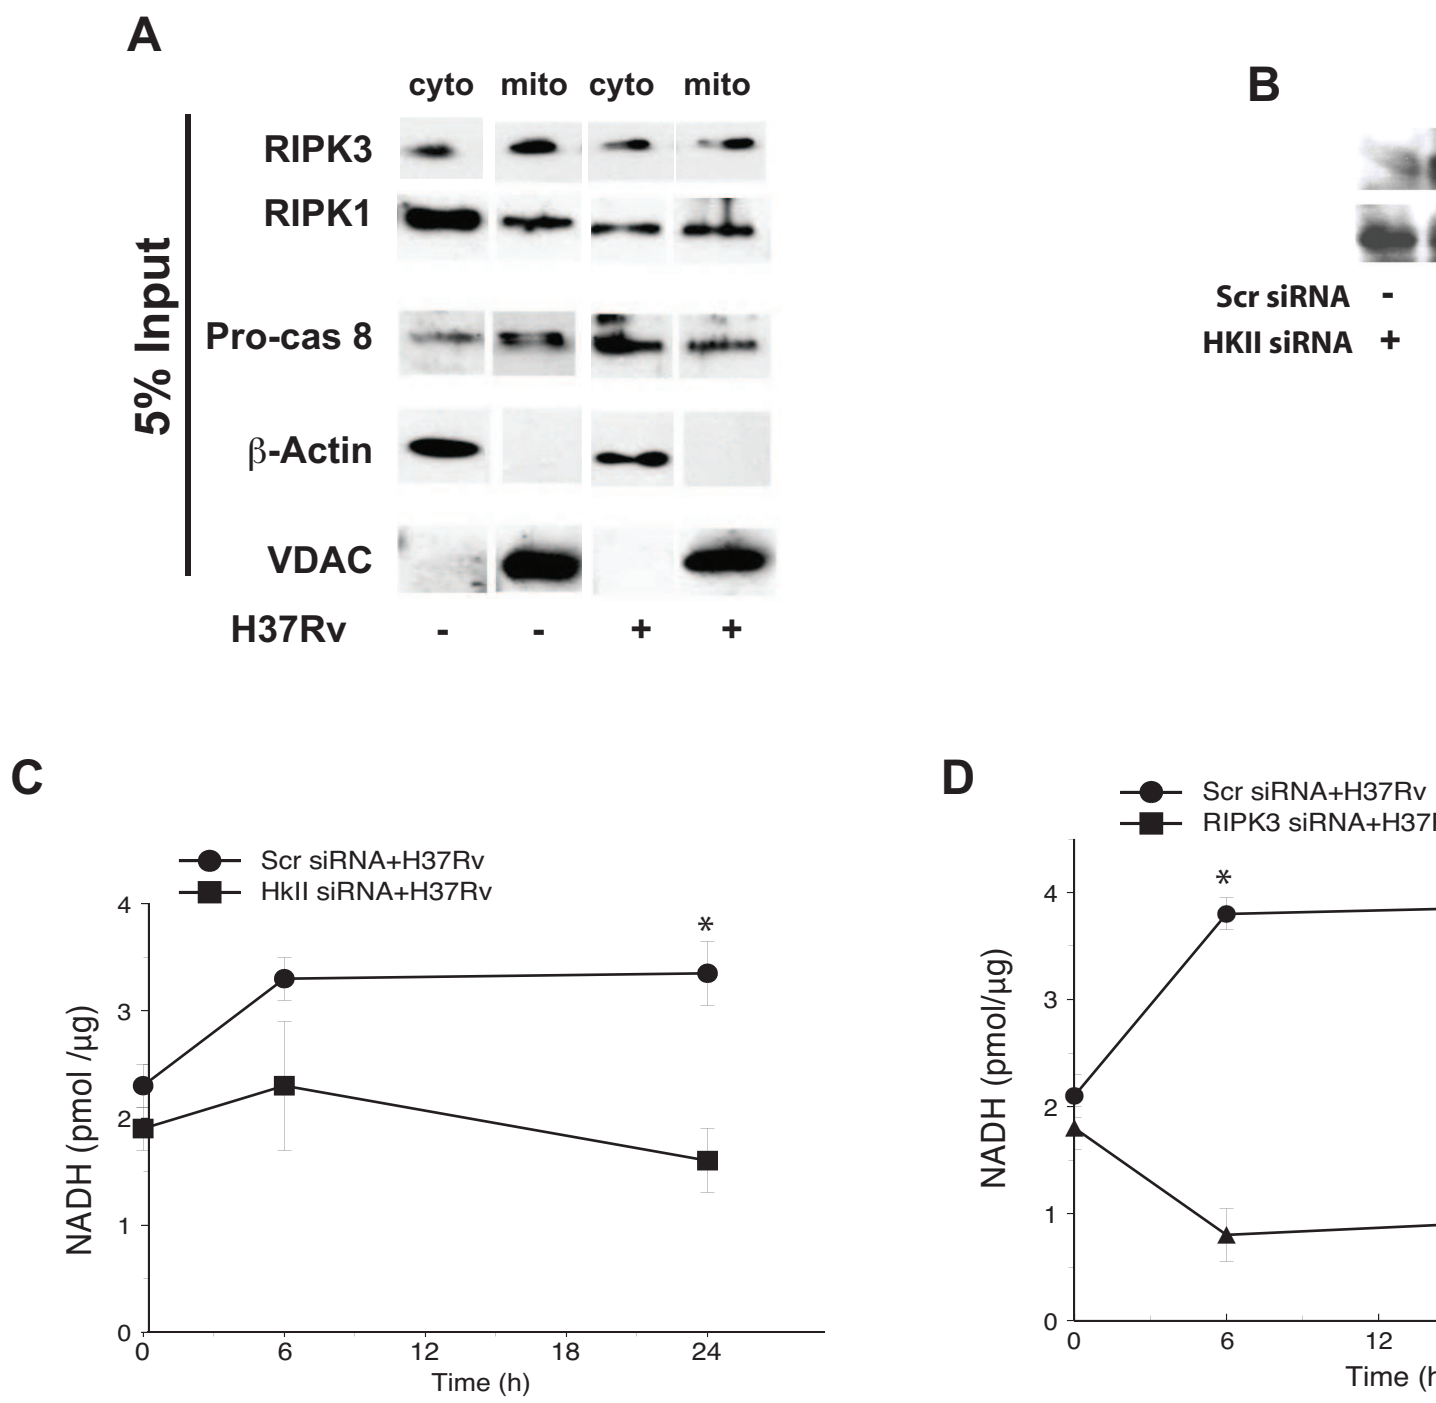

### Supplementary Figure 4

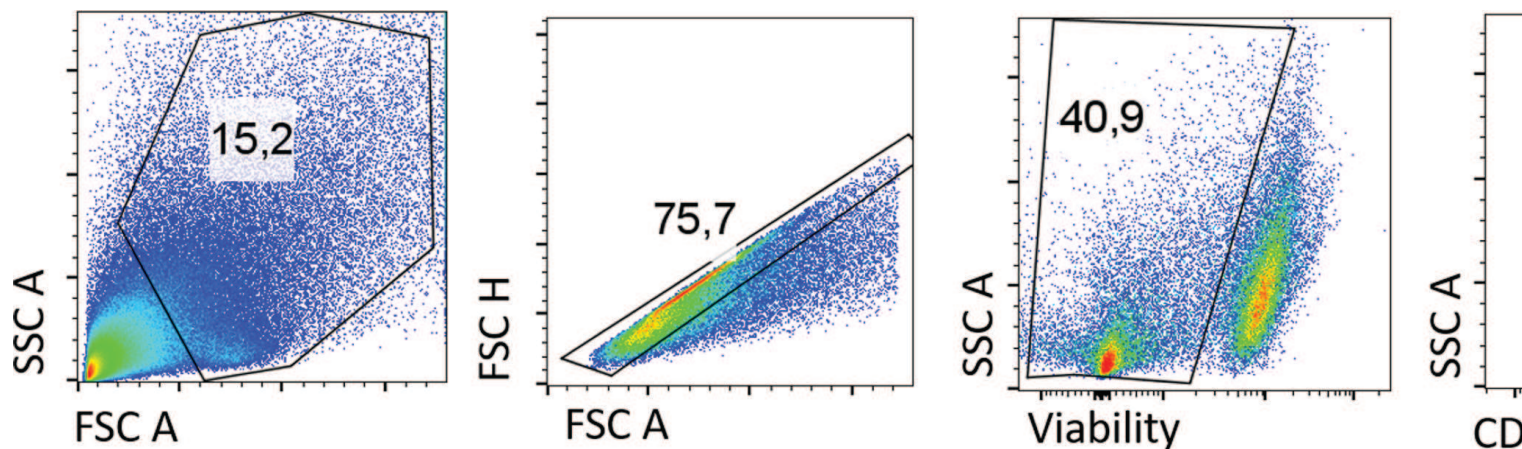

## Supplementary Figure 5

A

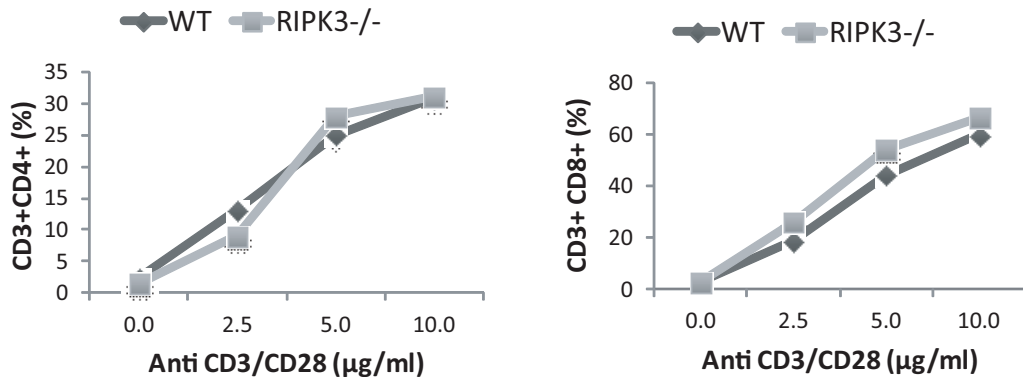

B

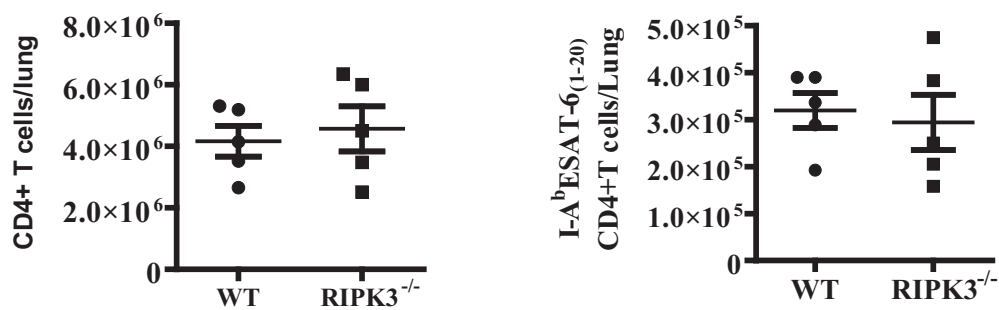

C

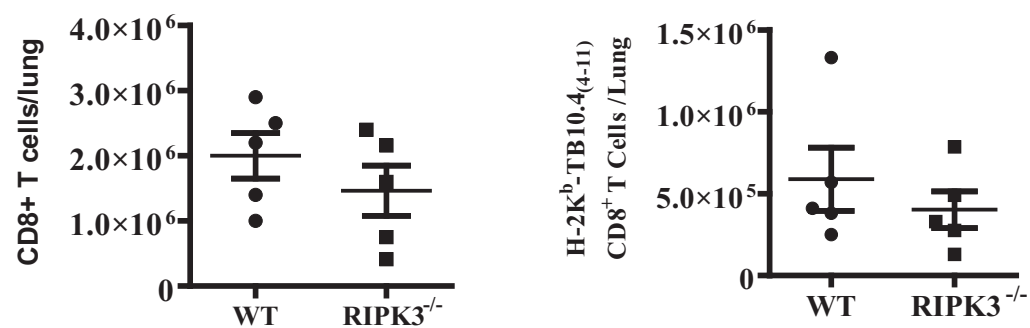

D

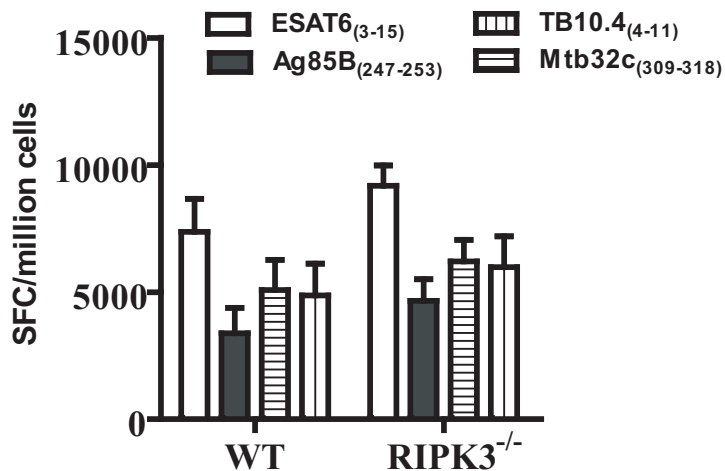

E

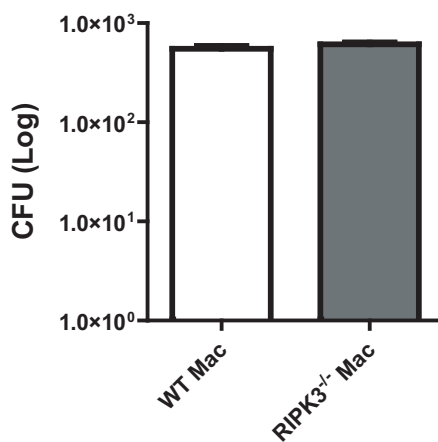

Supplement: NIHMS846715-supplement-supplement_1.pdf [file NIHMS846715-supplement-supplement_1.pdf]
